# Supplementary material for: Mutational burdens and evolutionary ages of thyroid follicular adenoma are comparable to those of follicular carcinoma
Source: PubMed Central journal article supplement (PMC5342504; doi:10.18632/oncotarget.11922), 2016-09-09
Supplement: oncotarget-07-69638-s001.pdf [file oncotarget-07-69638-s001.pdf]

# Mutational burdens and evolutionary ages of thyroid follicular adenoma are comparable to those of follicular carcinoma

## Supplementary Materials

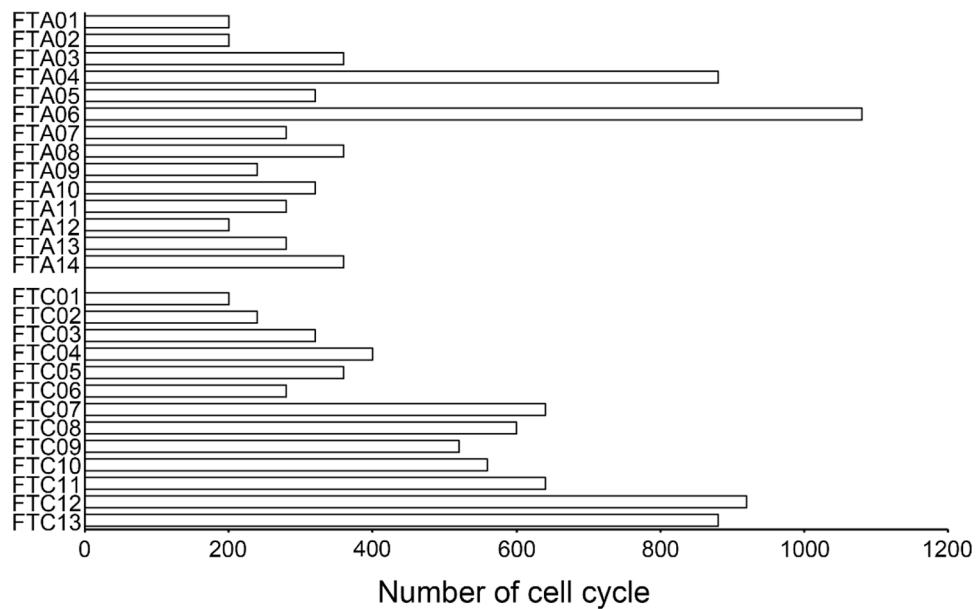

**Supplementary Figure S1: Somatic mutation-based estimation of evolutionary ages.** The number of cell cycles estimated by an evolutionary model that uses somatic mutations as molecular clocks are shown for 27 thyroid follicular tumor genomes.

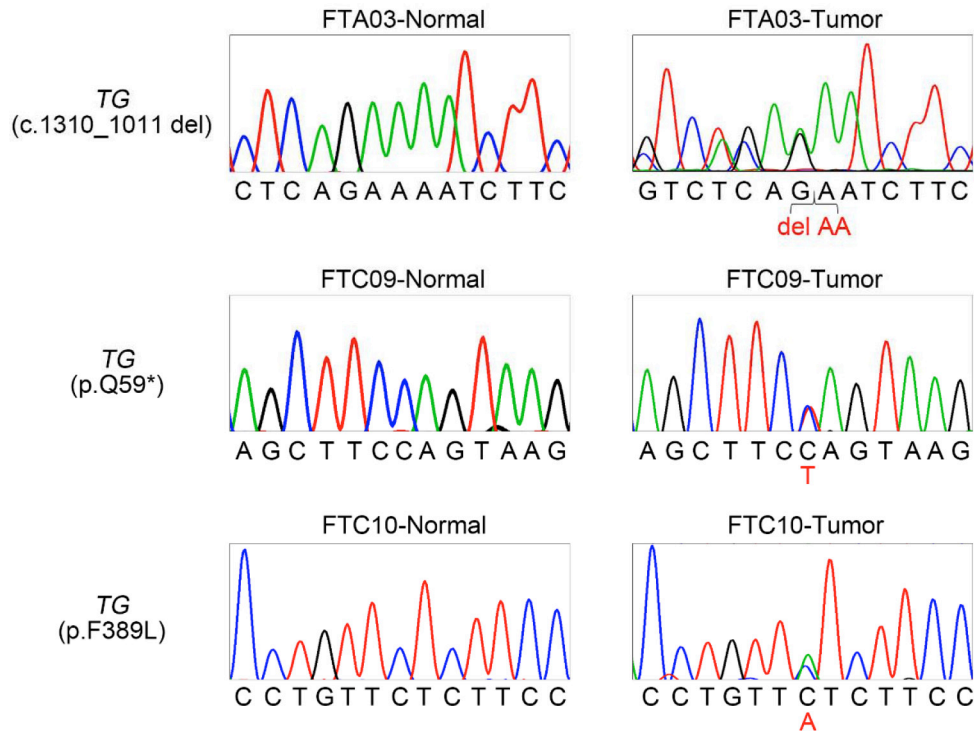

**Supplementary Figure S2: Sanger sequencings of three TG gene mutations in follicular tumors with matched normal.** All of the mutations were identified in tumor, but not normal and interpreted as somatic.

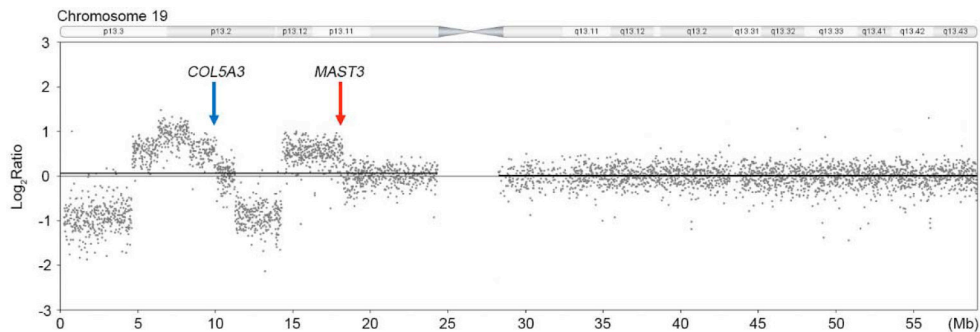

**Supplementary Figure S3: The complex recombination event on chromosome 19p13.3-p13.11 in FTC07.** This sample harbored *MAST3-COL5A3* fusion transcript and both genes were located on the breakpoints of copy number gains. Red and Blue arrow represent the *MAST3* and *COL5A3* gene, respectively. X-axis represents the genomic location and y-axis represents signal intensities on the  $\log_2$  scale.

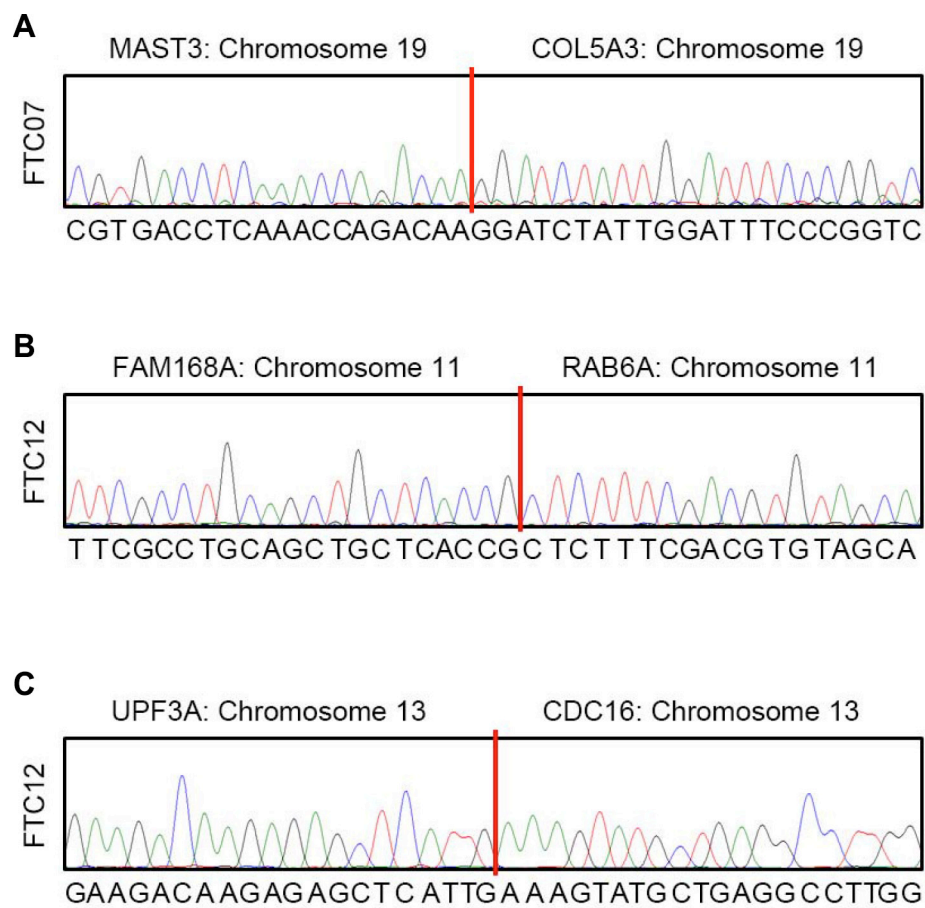

**Supplementary Figure S4: Fusion transcripts identified in the thyroid follicular tumors.** The *MAST3-COL5A3* identified in FTC07 is a novel fusion never reported in any database. The other two fusion events have been reported in solid cancers (*FAM168A-RAB6A* in lung cancer and *UPF3A-CDC16* in thyroid cancer); (A) *MAST3-COL5A3* (B) *FAM168A-RAB6A* (C) *UPF3A-CDC16*

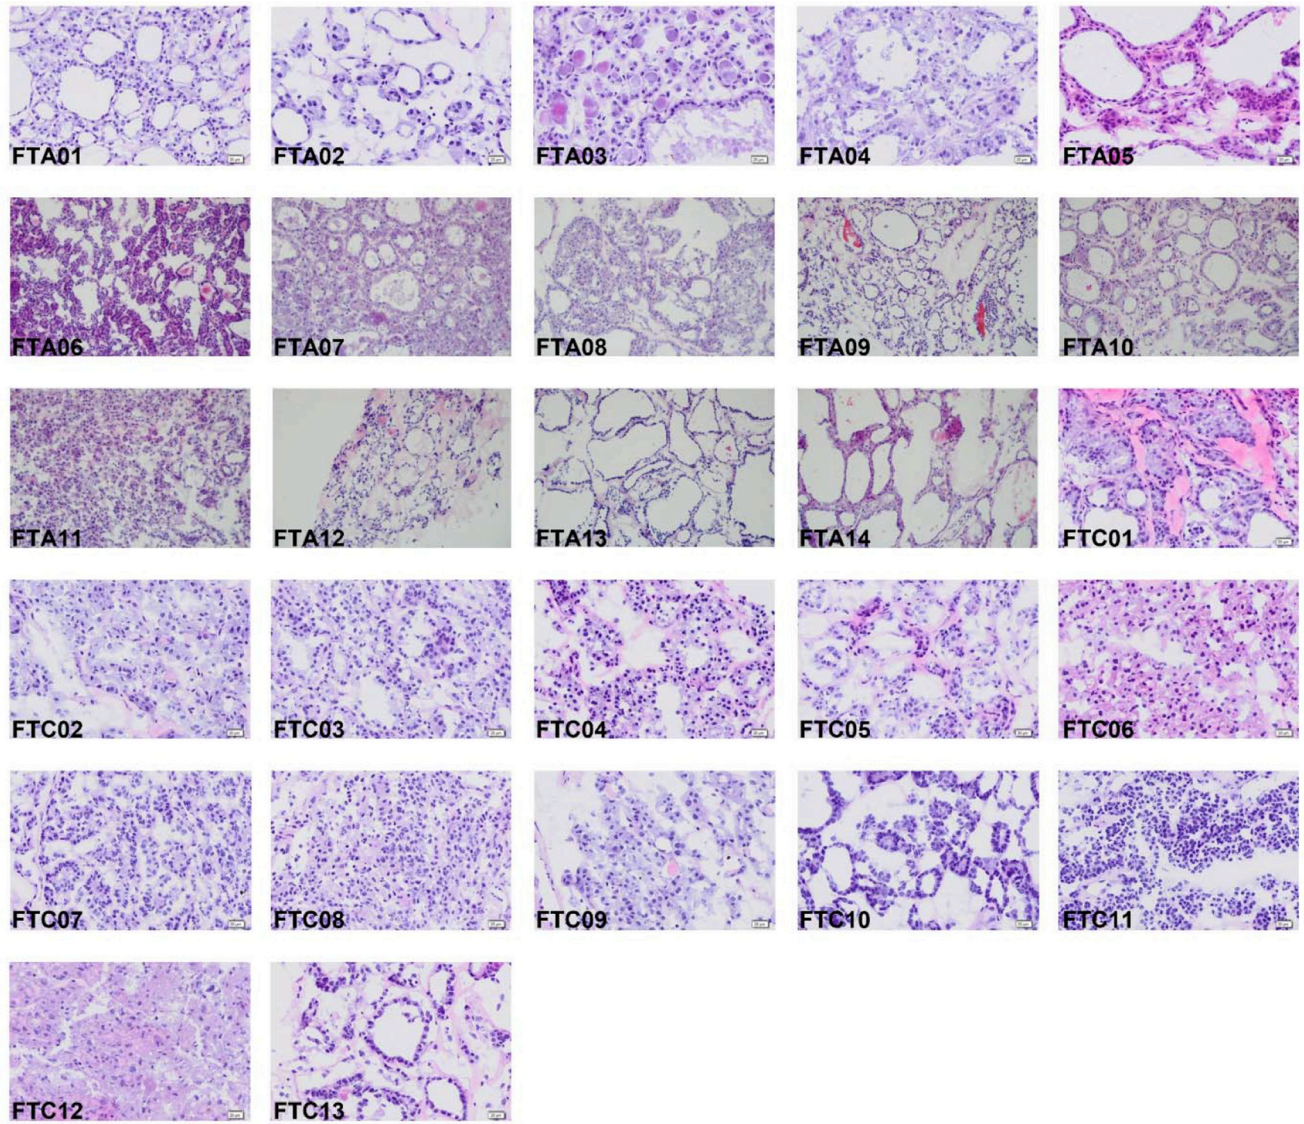

**Supplementary Figure S5: Representative histology of follicular thyroid tumors.** Frozen sections and hematoxylin/eosin staining of 27 follicular thyroid tumors. FTA: follicular thyroid adenoma, FTC: follicular thyroid carcinoma.

**Supplementary Table S1: The description of whole-exome sequencing data**

| Sample ID | Sequencing reads | Mapped reads (%)    | Mapped reads in exon (%) | Coverage (mean)* | Percent of bases (>= 20 reads)* |
|-----------|------------------|---------------------|--------------------------|------------------|---------------------------------|
| FTA01N    | 65,468,568       | 64,587,414 (98.7%)  | 50,268,929 (76.8%)       | 82.6             | 85.7                            |
| FTA01T    | 57,393,352       | 56,533,941 (98.5%)  | 44,382,347 (77.3%)       | 72.9             | 83.7                            |
| FTA02N    | 58,552,295       | 57,870,396 (98.8%)  | 45,095,672 (77.0%)       | 73.7             | 82.4                            |
| FTA02T    | 55,162,252       | 54,543,604 (98.9%)  | 43,146,859 (78.2%)       | 70.5             | 80.8                            |
| FTA03N    | 55,785,147       | 54,990,756 (98.6%)  | 43,278,637 (77.6%)       | 71.4             | 82.9                            |
| FTA03T    | 61,699,199       | 60,870,574 (98.7%)  | 48,345,376 (78.4%)       | 79.6             | 84.9                            |
| FTA04N    | 55,609,276       | 54,822,773 (98.6%)  | 42,883,407 (77.1%)       | 70.5             | 82.9                            |
| FTA04T    | 63,486,907       | 62,627,612 (98.7%)  | 49,762,055 (78.4%)       | 81.9             | 84.8                            |
| FTA05N    | 60,910,068       | 50,318,484 (82.6%)  | 38,498,090 (63.2%)       | 63.7             | 69.0                            |
| FTA05T    | 71,664,023       | 70,638,202 (98.6%)  | 54,627,819 (76.2%)       | 89.4             | 86.2                            |
| FTA06N    | 136,412,917      | 135,089,624 (99.0%) | 104,244,354 (76.4%)      | 180.4            | 98.1                            |
| FTA06T    | 120,147,983      | 119,050,691 (99.1%) | 89,042,151 (74.1%)       | 154.3            | 97.4                            |
| FTA07N    | 128,692,287      | 126,599,022 (98.4%) | 78,311,718 (60.9%)       | 135.8            | 97.1                            |
| FTA07T    | 138,745,705      | 136,609,920 (98.5%) | 88,693,507 (63.9%)       | 153.9            | 97.8                            |
| FTA08N    | 147,698,713      | 146,323,694 (99.1%) | 112,456,127 (76.1%)      | 195.6            | 98.1                            |
| FTA08T    | 140,295,349      | 138,718,395 (98.9%) | 101,117,655 (72.1%)      | 176.7            | 97.8                            |
| FTA09N    | 109,908,621      | 108,759,250 (99.0%) | 83,110,373 (75.6%)       | 145.0            | 97.2                            |
| FTA09T    | 125,295,744      | 123,789,789 (98.8%) | 87,715,579 (70.0%)       | 152.2            | 97.4                            |
| FTA10N    | 136,827,642      | 133,515,417 (97.6%) | 62,424,785 (45.6%)       | 108.5            | 96.0                            |
| FTA10T    | 94,563,234       | 93,423,929 (98.8%)  | 73,159,957 (77.4%)       | 127.2            | 96.8                            |
| FTA11N    | 107,044,772      | 105,913,036 (98.9%) | 82,015,009 (76.6%)       | 143.1            | 96.9                            |
| FTA11T    | 116,942,119      | 115,292,345 (98.6%) | 79,914,857 (68.3%)       | 139.6            | 97.0                            |
| FTA12N    | 114,768,728      | 113,110,734 (98.6%) | 78,362,303 (68.3%)       | 136.6            | 97.0                            |
| FTA12T    | 121,415,205      | 119,753,984 (98.6%) | 80,485,430 (66.3%)       | 140.0            | 97.0                            |
| FTA13N    | 124,921,384      | 123,263,018 (98.7%) | 89,992,148 (72.0%)       | 157.3            | 97.5                            |
| FTA13T    | 115,274,077      | 115,274,077 (100%)  | 89,222,069 (77.4%)       | 155.6            | 97.4                            |
| FTA14N    | 115,527,004      | 114,267,364 (98.9%) | 85,524,036 (74.0%)       | 149.2            | 97.4                            |
| FTA14T    | 120,246,215      | 117,941,814 (98.1%) | 65,293,193 (54.3%)       | 113.7            | 96.2                            |
| FTC01N    | 51,349,286       | 51,349,286 (100%)   | 40,776,769 (79.4%)       | 67.1             | 82.0                            |
| FTC01T    | 56,019,237       | 55,297,622 (98.7%)  | 43,803,045 (78.2%)       | 72.0             | 81.9                            |
| FTC02N    | 54,046,284       | 53,435,142 (98.9%)  | 41,295,037 (76.4%)       | 67.5             | 80.8                            |
| FTC02T    | 50,679,079       | 50,128,173 (98.9%)  | 39,225,031 (77.4%)       | 64.2             | 79.5                            |
| FTC03N    | 51,422,013       | 50,818,268 (98.8%)  | 39,197,574 (76.2%)       | 64.0             | 79.4                            |
| FTC03T    | 57,712,582       | 56,981,764 (98.7%)  | 43,994,783 (76.2%)       | 71.8             | 81.0                            |
| FTC04N    | 53,172,728       | 43,830,966 (82.4%)  | 33,486,773 (63.0%)       | 55.7             | 70.5                            |
| FTC04T    | 76,165,997       | 75,051,184 (98.5%)  | 57,583,363 (75.6%)       | 94.2             | 87.2                            |
| FTC05N    | 63,070,538       | 62,304,624 (98.8%)  | 49,001,196 (77.7%)       | 80.0             | 83.1                            |
| FTC05T    | 48,902,390       | 48,350,427 (98.9%)  | 38,211,637 (78.1%)       | 62.6             | 79.7                            |
| FTC06N    | 57,834,950       | 57,006,511 (98.6%)  | 43,715,136 (75.6%)       | 71.3             | 83.5                            |
| FTC06T    | 56,896,478       | 55,987,021 (98.4%)  | 42,792,897 (75.2%)       | 70.1             | 82.8                            |
| FTC07N    | 63,640,719       | 62,844,892 (98.8%)  | 48,660,884 (76.5%)       | 79.5             | 83.7                            |
| FTC07T    | 55,213,652       | 54,526,602 (98.8%)  | 42,333,159 (76.7%)       | 69.2             | 80.6                            |
| FTC08N    | 53,847,957       | 53,099,026 (98.6%)  | 41,160,652 (76.4%)       | 67.3             | 82.5                            |
| FTC08T    | 52,674,910       | 51,905,698 (98.5%)  | 40,572,639 (77.0%)       | 66.4             | 81.5                            |
| FTC09N    | 56,079,186       | 55,436,879 (98.9%)  | 43,186,847 (77.0%)       | 70.5             | 81.9                            |
| FTC09T    | 55,409,783       | 54,765,014 (98.8%)  | 43,324,795 (78.2%)       | 70.8             | 81.2                            |
| FTC10N    | 49,868,880       | 49,268,036 (98.8%)  | 37,669,564 (75.5%)       | 61.5             | 78.7                            |
| FTC10T    | 58,172,735       | 57,556,505 (98.9%)  | 44,707,174 (76.9%)       | 73.3             | 82.7                            |
| FTC11N    | 59,730,127       | 58,969,763 (98.7%)  | 45,514,176 (76.2%)       | 74.4             | 82.6                            |
| FTC11T    | 81,633,600       | 80,639,166 (98.8%)  | 62,383,638 (76.4%)       | 101.6            | 86.7                            |
| FTC12N    | 57,228,345       | 56,383,429 (98.5%)  | 44,619,297 (78.0%)       | 73.5             | 83.4                            |
| FTC12T    | 59,629,762       | 58,800,929 (98.6%)  | 46,477,988 (77.9%)       | 76.5             | 83.8                            |
| FTC13N    | 60,363,240       | 55,155,515 (91.4%)  | 43,928,239 (72.8%)       | 74.1             | 82.8                            |
| FTC13T    | 66,705,874       | 65,691,067 (98.5%)  | 50,223,254 (75.3%)       | 82.0             | 84.9                            |

\*The neoplasia and matched normal genomes are discriminated with the use of 'T' and 'N', respectively.

\*\*The mean coverage and the % of bases (>= 20 reads) were calculated onto the targeted regions (Agilent SureSelect 50 Mb exon).

**Supplementary Table S2: List of mutations identified by WES in 27 follicular tumors.** See Supplementary\_Table\_S2

**Supplementary Table S3: Correlations between genomic features and clinicopathologic features**

| Correlation                           | Correlation Coefficient | P-value |
|---------------------------------------|-------------------------|---------|
| Age-Number of mutations               | 0.484                   | 0.094   |
| Age-Number of driver mutations        | 0.493                   | 0.087   |
| Age-Number of CNAs                    | -0.065                  | 0.834   |
| Age-Evolutionary ages                 | 0.393                   | 0.184   |
| Tumor size-Number of mutations        | -0.032                  | 0.923   |
| Tumor size-Number of driver mutations | 0.557                   | 0.060   |
| Tumor size-Number of CNAs             | -0.517                  | 0.085   |
| Tumor size-Evolutionary ages          | -0.242                  | 0.449   |

**Table S4: Copy number alterations identified across 27 follicular tumors by array-CGH.** See Supplementary\_Table\_S4

**Table S5: Pathway and ontology analysis of mutations.** See Supplementary\_Table\_S5

**Supplementary Table S6: A list of fusion transcripts in 10 follicular tumors**

| Sample ID | Gene_A  | Gene_B | A_chr (strand) | B_chr (strand) | Discordant_n | JSR_n | Junction_A | Junction_B | Evalue | A_TAF | B_TAF | Frame        |
|-----------|---------|--------|----------------|----------------|--------------|-------|------------|------------|--------|-------|-------|--------------|
| FTC07     | MAST3   | COL5A3 | 19 (+)         | 19 (-)         | 2            | 5     | 18242857   | 10092794   | 0.11   | 0.2   | 1.0   | Out-of-frame |
| FTC12     | FAM168A | RAB6A  | 11 (-)         | 11 (-)         | 2            | 11    | 73308968   | 73390765   | 0.02   | 0.37  | 0.02  | 5UTR-CDS     |
| FTC12     | UPF3A   | CDC16  | 13 (+)         | 13 (+)         | 3            | 69    | 115052104  | 115028354  | 2.3    | 0.37  | 0.14  | Out-of-frame |
